# Supplementary material for: A Comparison of the Capacity of Mesenchymal Stromal Cells for Cartilage Regeneration Depending on Collagen-Based Injectable Biomimetic Scaffold Type
Source: Preprints.org preprint supplement (doi:10.20944/preprints202106.0739.v1), 2021-06-30
Supplement: Supplementary file 1 [file supplementary]

Supplemental Figure S1.


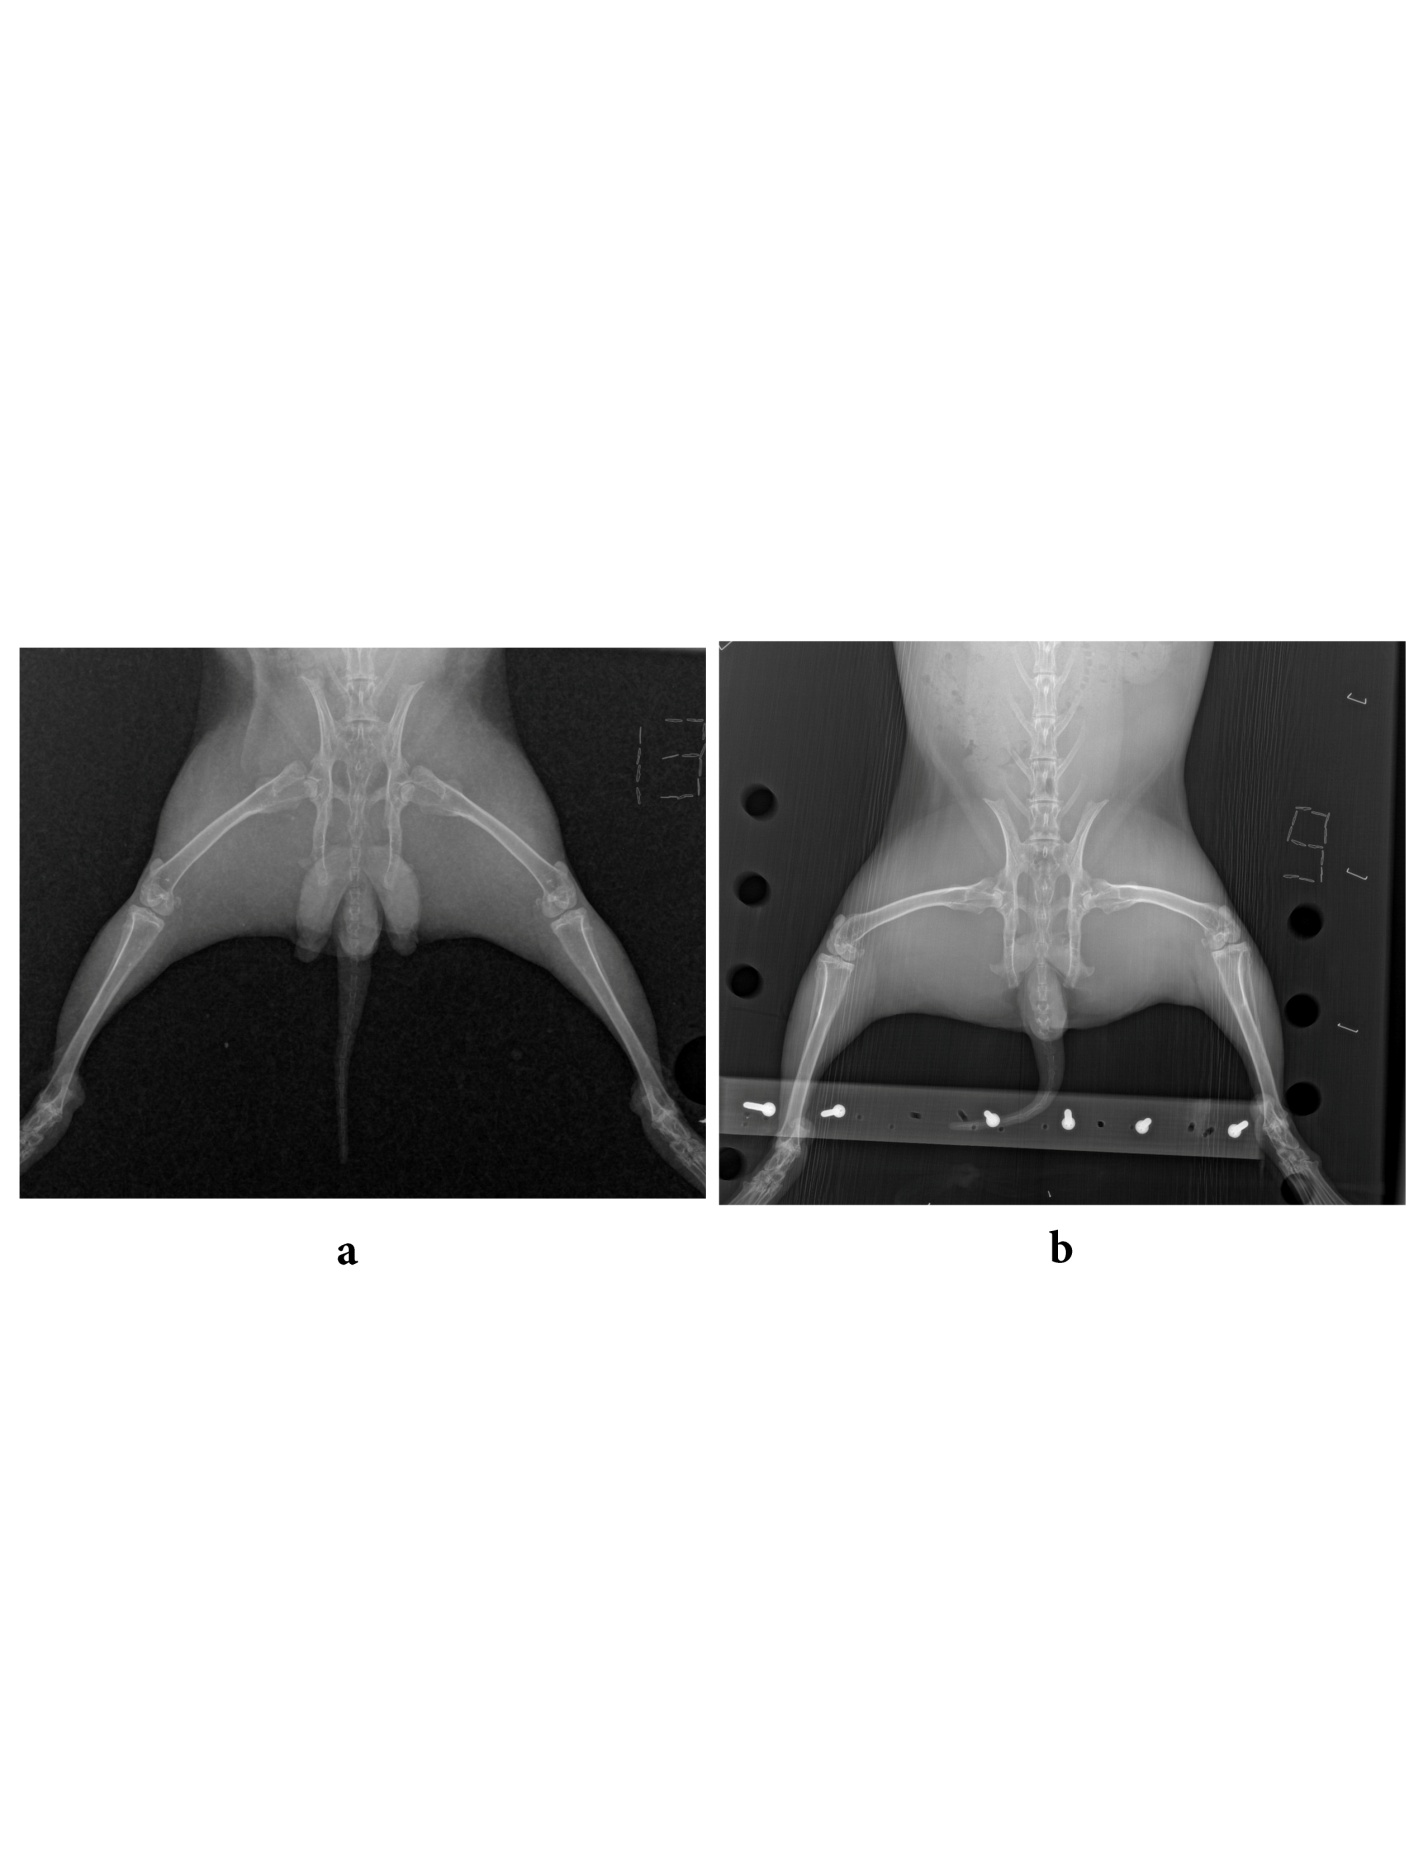


**Figure S1**. The results of X-ray examination: (**a**) intact animal, (**b**) osteoarthrosis model.
