# Supplementary material for: A Comparison of the Capacity of Mesenchymal Stromal Cells for Cartilage Regeneration Depending on Collagen-Based Injectable Biomimetic Scaffold Type
Source: Preprints.org preprint supplement (doi:10.20944/preprints202106.0739.v1), 2021-06-30
Supplement: Supplementary file 3 [file Supplemental Table S1.docx]

**Table S1.** The design of the experiment.

| **Days** | **-1** | **1** | **15** | **29** | **49** | **50** | **110** | **111** |
| --- | --- | --- | --- | --- | --- | --- | --- | --- |
| Group formation |  |  |  |  |  |  |  |  |
| Subcutaneous administration of methylated bovine serum albumin (mBSA) and Freunds complete adjuvant |  |  |  |  |  |  |  |  |
| Intra-articular injection of mBSA |  |  |  |  |  |  |  |  |
| Immunosuppression |  |  |  |  |  |  |  |  |
| Intra-articular injection of samples |  |  |  |  |  |  |  |  |
| Blood test |  |  |  |  |  |  |  |  |
| X-ray examination |  |  |  |  |  |  |  |  |
| Euthanasia |  |  |  |  |  |  |  |  |
