# Supplementary figures and images for: A Comparison of the Capacity of Mesenchymal Stromal Cells for Cartilage Regeneration Depending on Collagen-Based Injectable Biomimetic Scaffold Type
Source: Preprints.org preprint supplement (doi:10.20944/preprints202106.0739.v1), 2021-06-30

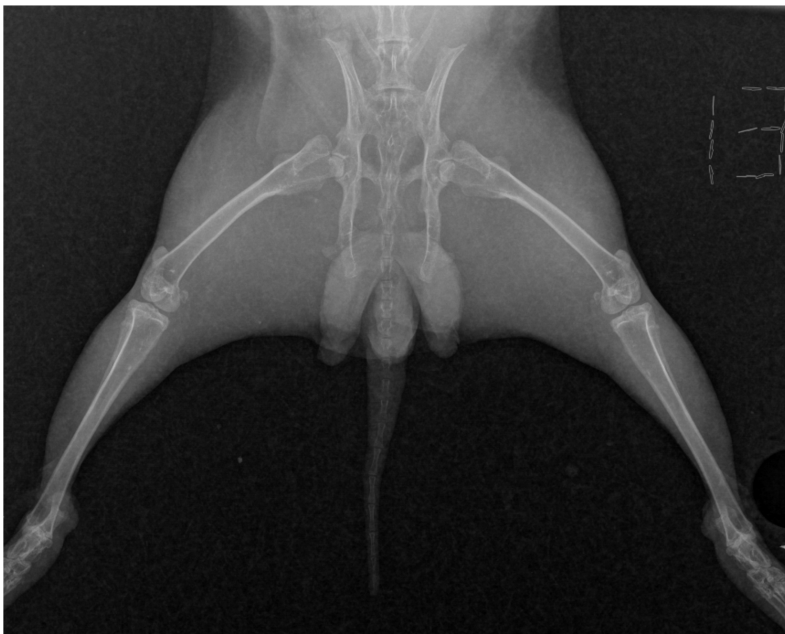

**a**

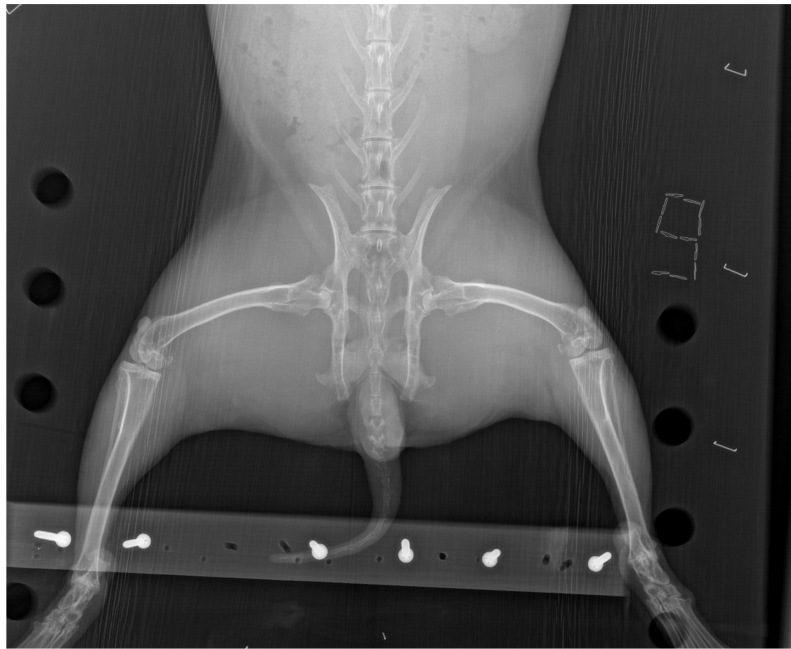

**b**

Supplement: Supplementary file 1 [file supplementary]
